# Supplementary material
Source: PubMed Central journal article supplement (PMC9556164)
Supplement: NIHMS1508968-supplement-Supplemental_Digital_Content_1.pdf [file NIHMS1508968-supplement-Supplemental_Digital_Content_1.pdf]

## ASA Practice Advisory for Perioperative Visual Loss Advisory Associated with Spine Surgery 2019 Update – Supplement 1: Bibliography in Alphabetical Order

1. Practice advisory for perioperative visual loss associated with spine surgery: an updated report by the American Society of Anesthesiologists task force on perioperative visual loss. *Anesthesiology* 2012; 116:274-85
2. Agarwal N, Hansberry DR, Goldstein IM: Cortical blindness following posterior lumbar decompression and fusion. *J Clin Neurosci* 2014; 21:155-9
3. Akpinar E, Gurbuz MS, Bitirgen G, Okutan MO: Unilateral vision loss without ophthalmoplegia as a rare complication of spinal surgery. *J Neurosci Rural Pract* 2017; 8:288-90
4. Alexandrakis G, Lam BL: Bilateral posterior ischemic optic neuropathy after spinal surgery. *Am J Ophthalmol* 1999; 127:354-5
5. Amorim Correa JL, Acioly MA: The enigma of orbital compartment syndrome after lumbar spine surgery in the prone position: Case report and literature review. *World Neurosurg* 2018; 110:309-14
6. Beck RW, Servais GE, Hayreh SS: Anterior ischemic optic neuropathy. IX. Cup-to-disc ratio and its role in pathogenesis. *Ophthalmology* 1987; 94:1503-8
7. Bekar A, Tureyen K, Aksoy K: Unilateral blindness due to patient positioning during cervical syringomyelia surgery: Unilateral blindness after prone position. *J Neurosurg Anesthesiol* 1996; 8:227-9
8. Bermejo-Alvarez MA, Carpintero M, Garcia-Carro G, Acebal G, Fervienza P, Cosio F: Ischemic optic neuropathy after lumbar spine surgery. *Rev Esp Anesthesiol Reanim* 2007; 54:621-5
9. Biousse V, Newman NJ: Ischemic optic neuropathies. *N Engl J Med* 2015; 372:2428-36
10. Bojinova RI, Konieczka K, Todorova MG: Unilateral loss of vision after spinal surgery in a patient with flammer syndrome. *Klin Monatsbl Augenheilkd* 2016; 233:429-31
11. Bradish CF, Flowers M: Central retinal artery occlusion in association with osteogenesis imperfecta. *Spine (Phila Pa 1976)* 1987; 12:193-4
12. Brown RH, Schauble JF, Miller NR: Anemia and hypotension as contributors to perioperative loss of vision. *Anesthesiology* 1994; 80:222-6
13. Calway T, Rubin DS, Moss HE, Joslin CE, Mehta AI, Roth S: Perioperative retinal artery occlusion: incidence and risk factors in spinal fusion surgery from the us national inpatient sample 1998–2013. *J Neuroophthalmol* 2018; 38:36-41
14. Chalam KV, Shah VA: Severe bilateral posterior ischemic optic neuropathy as a complication of spinal surgery. *Eye (Lond)* 2005; 19:367-8
15. Chang S-H, Miller NR: The incidence of visual loss due to perioperative ischemic optic neuropathy associated with spine surgery: The Johns Hopkins hospital experience. *Spine* 2005; 30:1299-1302
16. Cheng MA, Sigurdson W, Tempelhoff R, Laurysen C: Visual loss after spine surgery: A survey. *Neurosurgery* 2000; 46:625-30
17. Chung MS, Son JH: Visual loss in one eye after spinal surgery. *Korean J Ophthalmol* 2006; 20:139-42
18. Corda DM, Dexter F, Pasternak JJ, Trentman TL, Nottmeier EW, Brull SJ: Patients' perspective on full disclosure and informed consent regarding postoperative visual loss associated with spinal surgery in the prone position. *Mayo Clinic Proc* 2011; 86:865-8
19. De la Garza-Ramos R, Samdani AF, Sponseller PD, Ain MC, Miller NR, Shaffrey CI, Sciubba DM: Visual loss after corrective surgery for pediatric scoliosis: Incidence and risk factors from a nationwide database. *Spine J* 2016; 16:516-22
20. Dilger JA, Tetzlaff JE, Bell GR, Kosmorsky GS, Agnor RC, O'Hara JF, Jr.: Ischaemic optic neuropathy after spinal fusion. *Can J Anaesth* 1998; 45:63-6
21. Dunker S, Hsu HY, Sebag J, Sadun AA: Perioperative risk factors for posterior ischemic optic neuropathy. *J Am Coll Surg* 2002; 194:705-10
22. Edwards CC, 2nd, Lessing NL, Ford L, Edwards CC: Deep vein thrombosis after complex posterior spine surgery: Does staged surgery make a difference? *Spine Deform* 2018; 6:141-7
23. Emery SE, Daffner SD, France JC, Ellison M, Grose BW, Hobbs GR, Clovis NB: Effect of head position on intraocular pressure during lumbar spine fusion: a randomized, prospective study. *J Bone Joint Surg Am* 2015; 97:1817-23
24. Farag E, Abd-Elsayed AA, Dalton JE, Nada E, Parker BM: Postoperative vision loss after spine surgery: A single-institution case-control comparison. *Ochsner J* 2014; 14:179-83
25. Goni V, Tripathy SK, Goyal T, Tamuk T, Panda BB, Bk S: Cortical blindness following spinal surgery: very rare cause of perioperative vision loss. *Asian Spine J* 2012; 6:287-90

26. Grossman W, Ward WT: Central retinal artery occlusion after scoliosis surgery with a horseshoe headrest. Case report and literature review. *Spine (Phila Pa 1976)* 1993; 18:1226-8
27. Hassani V, Homaei MM, Shahbazi A, Zamani MM, Safari S, Nadi S, Rahimizadeh A, Lashkari MH, Alizadeh Zendehtood S: Human erythropoietin effect in postoperative visual loss following spine surgery: A case report. *Anesth Pain Med* 2014; 4:e7291
28. Hassanzadeh H, Gjolaj JP, El Dafrawy MH, Jain A, Skolasky RL, Cohen DB, Kebaish KM: The timing of surgical staging has a significant impact on the complications and functional outcomes of adult spinal deformity surgery. *Spine J* 2013; 13:1717-22
29. Hoff JM, Varhaug P, Midelfart A, Lund-Johansen M: Acute visual loss after spinal surgery. *Acta Ophthalmol* 2010; 88:490-2
30. Hoski JJ, Eismont FJ, Green BA: Blindness as a complication of intraoperative positioning. A case report. *J Bone Joint Surg Am* 1993; 75:1231-2
31. Huber JF, Grob D: Bilateral cortical blindness after lumbar spine surgery. A case report. *Spine (Phila Pa 1976)* 1998; 23:1807-9
32. Ibrahim TF, Sweis RT, Nockels RP: Reversible postoperative blindness caused by bilateral status epilepticus amauroticus following thoracolumbar deformity correction: Case report. *J Neurosurg Spine* 2017; 27:63-7
33. Jampol LM, Goldbaum M, Rosenberg M, Bahr R: Ischemia of ciliary arterial circulation from ocular compression. *Arch Ophthalmol* 1975; 93:1311-7
34. Kamming D, Clarke S: Postoperative visual loss following prone spinal surgery. *Br J Anaesth* 2005; 95:257-60
35. Kasodekar VB, Chen JL: Monocular blindness: a complication of intraoperative positioning in posterior cervical spine surgery. *Singapore Med J* 2006; 47:631-3
36. Katz DA, Karlin LI: Visual field defect after posterior spine fusion. *Spine (Phila Pa 1976)* 2005; 30:E83-5
37. Katz DM, Trobe JD, Cornblath WT, Kline LB: Ischemic optic neuropathy after lumbar spine surgery. *Arch Ophthalmol* 1994; 112:925-31
38. Katzman SS, Moschonas CG, Dzioba RB: Amaurosis secondary to massive blood loss after lumbar spine surgery. *Spine (Phila Pa 1976)* 1994; 19:468-9
39. Kim JW, Hills WL, Rizzo JF, Egan RA, Lessell S: Ischemic optic neuropathy following spine surgery in a 16-year-old patient and a ten-year-old patient. *J Neuroophthalmol* 2006; 26:30-3
40. Kueper J, Loftus ML, Boachie-Adjei O, Lebl D: Posterior reversible encephalopathy syndrome: temporary visual loss after spinal deformity surgery. *Am J Orthop (Belle Mead NJ)* 2015; 44:E465-8
41. Kumar N, Jivan S, Topping N, Morrell AJ: Blindness and rectus muscle damage following spinal surgery. *Am J Ophthalmol* 2004; 138:889-91
42. Lee AG: Ischemic optic neuropathy following lumbar spine surgery. Case report. *J Neurosurg* 1995; 83:348-9
43. Lee LA, Lam AM: Unilateral blindness after prone lumbar spine surgery. *Anesthesiology* 2001; 95:793-5
44. Lee LA, Roth S, Posner KL, Cheney FW, Caplan RA, Newman NJ, Domino KB: The American Society of Anesthesiologists Postoperative Visual Loss Registry: Analysis of 93 spine surgery cases with postoperative visual loss. *Anesthesiology* 2006; 105:652-9
45. Lee LA, Roth S, Todd MM, Posner KL, Polissar NL, Neradilek MB, Torner J, Newman NJ, Domino KB, Lauer KK, Buddithi R, Gollapudy S, Pajewski TN, Scalzo DC, Avitsian R, Brown MJ, Buenvenida S, Mashour GA, Moore LE, Samra SK, Lieberman J, Lane RK, Ramani R, Wagner J, Tempelhoff R, Monsey CM, Robicsek SA, Vu MM, Weeks J, Manninen PH, Fu ES, Sanchez-Yanes GC, Peterfreund RA, Albrecht MA, Sapire KJ, Baughman VL, Caplan RA, Cheney FW, Metzner J: Risk factors associated with ischemic optic neuropathy after spinal fusion surgery. *Anesthesiology* 2012; 116:15-24
46. Lee SH, Chung I, Choi DS, Shin IW, Kim S, Kang S, Kim JY, Chung YK, Sohn JT: Visual loss due to optic nerve infarction and central retinal artery occlusion after spine surgery in the prone position: A case report. *Medicine (Baltimore)* 2017; 96:e7379
47. Leibovitch I, Casson R, Laforest C, Selva D: Ischemic orbital compartment syndrome as a complication of spinal surgery in the prone position. *Ophthalmology* 2006; 113:105-8
48. Locastro A, Novak KD, Biglan AW: Central retinal artery occlusion in a child after general anesthesia. *Am J Ophthalmol* 1991; 112:91-2
49. Maddox JJ, Pruitt DR, Agel J, Bransford RJ: Unstaged versus staged posterior-only thoracolumbar fusions in deformity: A retrospective comparison of perioperative complications. *Spine J* 2014; 14:1159-65

50. Mertens E, Smets RM, Sys J, Michielsens J, Verstreken J, Tassignon MJ: Central retinal artery occlusion after back surgery: a case report. *Bull Soc Belge Ophtalmol* 1995; 255:127-31
51. Mishra RK, Mahajan C, Bindra A, Goyal K: Postoperative visual loss following dorsal root entry zone rhizotomy: A dreaded complication after a benign procedure. *Saudi J Anaesth* 2016; 10:449-52
52. Mohan K, Rawall S, Nene A: Visual loss after spine surgery. *Indian J Orthop* 2012; 46:106-8
53. Montero JA, Ruiz-Moreno JM, Galindo A, Fernandez-Munoz M: Release hallucinations and visual loss as first manifestations of postoperative unilateral blindness. *Eur J Ophthalmol* 2007; 17:844-6
54. Murphy MA: Bilateral posterior ischemic optic neuropathy after lumbar spine surgery. *Ophthalmology* 2003; 110:1454-7
55. Nakra D, Bala I, Pratap M: Unilateral postoperative visual loss due to central retinal artery occlusion following cervical spine surgery in prone position. *Paediatr Anaesth* 2007; 17:805-8
56. Nandyala SV, Marquez-Lara A, Fineberg SJ, Singh R, Singh K: Incidence and risk factors for perioperative visual loss after spinal fusion. *Spine J* 2014; 14:1866-72
57. Ooi EI, Ahem A, Zahidin AZ, Bastion ML: Unilateral visual loss after spine surgery in the prone position for extradural haematoma in a healthy young man. *BMJ Case Rep* 2013; doi: 10.1136/bcr-2013-200632
58. Passias PG, Poorman GW, Jalai CM, Line B, Diebo B, Park P, Hart R, Burton D, Schwab F, Lafage V, Bess S, Errico T: Outcomes of open staged corrective surgery in the setting of adult spinal deformity. *Spine J* 2017; 17:1091-9
59. Patil CG, Lad EM, Lad SP, Ho C, Boakye M: Visual loss after spine surgery: A population-based study. *Spine (Phila Pa 1976)* 2008; 33:1491-6
60. Pin-On P, Boonsri S: Postoperative visual loss in orthopedic spine surgery in the prone position: a case report. *J Med Assoc Thai* 2015; 98:320-4
61. Quraishi NA, Wolinsky JP, Gokaslan ZL: Transient bilateral post-operative visual loss in spinal surgery. *Eur Spine J* 2012; 21 Suppl 4:S495-8
62. Raj A, Arya SK, Sood S: Unilateral visual loss due to central retinal artery occlusion with total ophthalmoplegia following cervical spine surgery in prone position. *Nepal J Ophthalmol* 2015; 7:191-3
63. Reddy A, Foroozan R, Edmond JC, Hinckley LK: Dilated superior ophthalmic veins and posterior ischemic optic neuropathy after prolonged spine surgery. *J Neuroophthalmol* 2008; 28:327-8
64. Ripart J, Desmots JM: Loss of vision after anaesthesia for nonophthalmic surgery: A persistent problem. *Eur J Anaesthesiol* 2009; 26:524-6
65. Roth S, Nunez R, Schneider BD: Unexplained visual loss after lumbar spinal fusion. *J Neurosurg Anesthesiol* 1997; 9:346-8
66. Roth S, Tung A, Ksiazek S: Visual loss in a prone-positioned spine surgery patient with the head on a foam headrest and goggles covering the eyes: An old complication with a new mechanism. *Anesth Analg* 2007; 104:1185-7
67. Rubin DS, Parakati I, Lee LA, Moss HE, Joslin CE, Roth S: Perioperative visual loss in spine fusion surgery: Ischemic optic neuropathy in the United States from 1998 to 2012 in the nationwide inpatient sample. *Anesthesiology* 2016; 125:457-64
68. Samdani AF, Rutter L, Betz RR, Mulcahey MJ: Vision loss after spinal fusion for scoliosis in a child with spinal cord injury. *J Spinal Cord Med* 2009; 32:591-4
69. Shifa J, Abebe W, Bekele N, Habte D: A case of bilateral visual loss after spinal cord surgery. *Pan Afr Med J* 2016; 23:119
70. Shillingford JN, Laratta JL, Sarpong NO, Swindell H, Cerpa M, Lehman RA, Lenke LG, Fischer C: Visual loss following spine surgery: What have we seen within the scoliosis research society morbidity and mortality database? *Spine (Phila Pa 1976)* 2018; 43:1201-07
71. Stang-Veldhouse KN, Yeu E, Rothenberg DM, Mizen TR: Unusual presentation of perioperative ischemic optic neuropathy following major spine surgery. *J Clin Anesth* 2010; 22:52-5
72. Stevens WR, Glazer PA, Kelley SD, Lietman TM, Bradford DS: Ophthalmic complications after spinal surgery. *Spine (Phila Pa 1976)* 1997; 22:1319-24
73. Sys J, Michielsens J, Mertens E, Verstreken J, Tassignon MJ: Central retinal artery occlusion after spinal surgery. *Eur Spine J* 1996; 5:74-5
74. West J, Askin G, Clarke M, Vernon SA: Loss of vision in one eye following scoliosis surgery. *Br J Ophthalmol* 1990; 74:243-4
75. Wolfe SW, Lospinuso MF, Burke SW: Unilateral blindness as a complication of patient positioning for spinal surgery. A case report. *Spine (Phila Pa 1976)* 1992; 17:600-5
76. Yilmaz M, Kalemci O: Visual loss after lumbar discectomy due to cortical infarction: case report. *J Neurol Sci* 2013; 30:422-6

77. Yu YH, Chen WJ, Chen LH, Chen WC: Ischemic orbital compartment syndrome after posterior spinal surgery. *Spine (Phila Pa 1976)* 2008; 33:E569-72
78. Zimmerer S, Koehler M, Turtschi S, Palmowski-Wolfe A, Girard T: Amaurosis after spine surgery: survey of the literature and discussion of one case. *Eur Spine J* 2011; 20:171-6
