# Supplementary material
Source: PubMed Central journal article supplement (PMC9556164)
Supplement: NIHMS1508968-supplement-Supplemental_Digital_Content_2.pdf [file NIHMS1508968-supplement-Supplemental_Digital_Content_2.pdf]

ASA Practice Advisory for Perioperative Visual Loss Associated with Spine Surgery 2019  
 Supplement 2 - Literature Search Summary and PRISMA Diagram

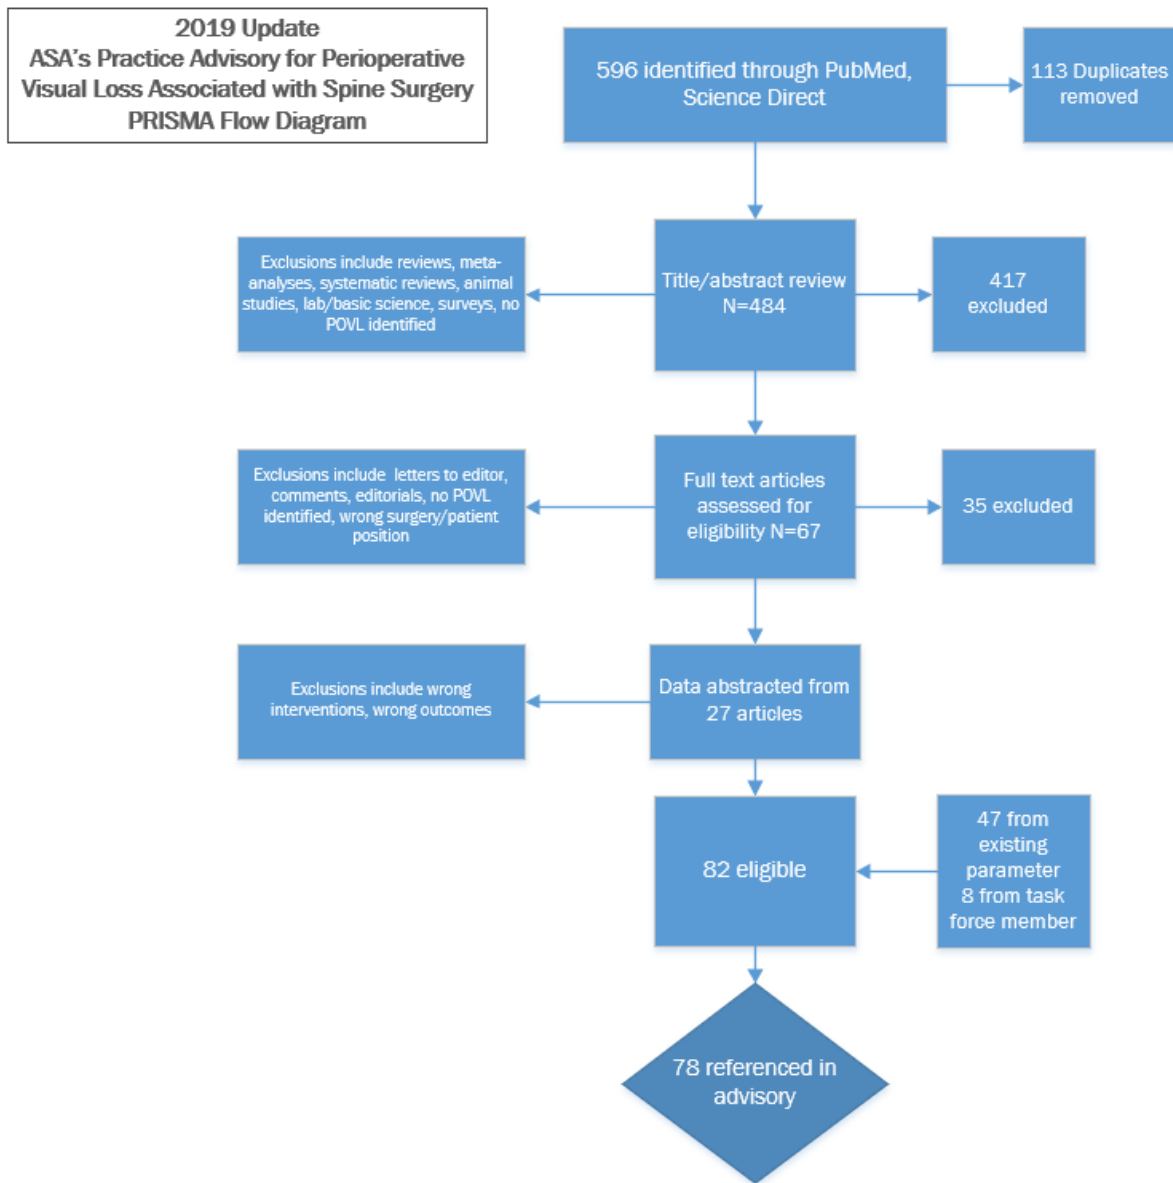

|                                                                                |                                                                                                                                                                                                                                                                                                                                                                                                                                                                                                                                                                                                                                                                                                                                                                                                                                                                                                                                                                                                                                                                                                                                                                                                                                                                                                                                                                                                                                                                                                                                                                                                                                                                                                                                                                                                                                                                                                                                                                                                                                                                                                                                                                                                                                                                                                                                                                                                                                                                                                                                                                                                                                                                                                                                                                                                                                                                                                                                                                                                                                                                                                                                                                                                                                                                                                                                                                                                                                                                                                                                                                                                                                |
|--------------------------------------------------------------------------------|--------------------------------------------------------------------------------------------------------------------------------------------------------------------------------------------------------------------------------------------------------------------------------------------------------------------------------------------------------------------------------------------------------------------------------------------------------------------------------------------------------------------------------------------------------------------------------------------------------------------------------------------------------------------------------------------------------------------------------------------------------------------------------------------------------------------------------------------------------------------------------------------------------------------------------------------------------------------------------------------------------------------------------------------------------------------------------------------------------------------------------------------------------------------------------------------------------------------------------------------------------------------------------------------------------------------------------------------------------------------------------------------------------------------------------------------------------------------------------------------------------------------------------------------------------------------------------------------------------------------------------------------------------------------------------------------------------------------------------------------------------------------------------------------------------------------------------------------------------------------------------------------------------------------------------------------------------------------------------------------------------------------------------------------------------------------------------------------------------------------------------------------------------------------------------------------------------------------------------------------------------------------------------------------------------------------------------------------------------------------------------------------------------------------------------------------------------------------------------------------------------------------------------------------------------------------------------------------------------------------------------------------------------------------------------------------------------------------------------------------------------------------------------------------------------------------------------------------------------------------------------------------------------------------------------------------------------------------------------------------------------------------------------------------------------------------------------------------------------------------------------------------------------------------------------------------------------------------------------------------------------------------------------------------------------------------------------------------------------------------------------------------------------------------------------------------------------------------------------------------------------------------------------------------------------------------------------------------------------------------------------|
| <b>Search terms (AND, OR, NOT) and truncation (wildcard characters like *)</b> | <p>Posterior ischemic optic neuropathy[Title/Abstract] AND ("2011/01/01"[PDAT] : "2017/06/01"[PDAT]) AND "humans"[MeSH Terms] AND English[lang]</p> <p>Anterior ischemic optic neuropathy[Title/Abstract] AND ("2011/01/01"[PDAT] : "2017/06/01"[PDAT]) AND "humans"[MeSH Terms] AND English[lang]</p> <p>Central retinal artery occlusion[Title/Abstract] AND ("2011/01/01"[PDAT] : "2017/06/01"[PDAT]) AND "humans"[MeSH Terms] AND English[lang]</p> <p>Perioperative cortical blindness [Title/Abstract] AND ("2011/01/01"[PDAT] : "2017/06/01"[PDAT]) AND Humans[Mesh] AND English[lang]</p> <p>Perioperative visual loss [Title/Abstract] AND ("2011/01/01"[PDAT] : "2017/06/01"[PDAT]) AND "humans"[MeSH Terms] AND English[lang]</p> <p>((("Perioperative visual loss "[Title/Abstract] AND ("2011/01/01"[PDAT] : "2017/06/01"[PDAT]) AND "humans"[MeSH Terms] AND English[lang])) AND "Spine Surgery"[Title/Abstract]) AND "Prone"[Title/Abstract]</p> <p>POVL[Title/Abstract] AND ("2017/06/01"[PDAT] : "2018/12/31"[PDAT]) AND "humans"[MeSH Terms] AND English[lang]</p> <p>Postoperative visual loss[Title/Abstract] AND ("2017/06/01"[PDAT] : "2018/12/31"[PDAT]) AND "humans"[MeSH Terms] AND English[lang]</p> <p>(PION[Title/Abstract] AND Surgery[Title/Abstract]) AND Prone[Title/Abstract] AND ("2011/01/01"[PDAT] : "2017/06/01"[PDAT]) AND "humans"[MeSH Terms] AND English[lang]</p> <p>(AION[Title/Abstract] AND Surgery[Title/Abstract]) AND Prone[Title/Abstract] AND ("2011/01/01"[PDAT] : "2017/06/01"[PDAT]) AND "humans"[MeSH Terms] AND English[lang]</p> <p>(ION[Title/Abstract] AND Surgery[Title/Abstract]) AND Prone[Title/Abstract] AND ("2011/01/01"[PDAT] : "2017/06/01"[PDAT]) AND "humans"[MeSH Terms] AND English[lang]</p> <p>(ION[Title/Abstract] AND ("2017/06/01"[PDAT] : "2018/12/31"[PDAT]) AND "humans"[MeSH Terms] AND English[lang]) AND Spine surgery[Title/Abstract] AND ("2017/06/01"[PDAT] : "2018/12/31"[PDAT]) AND "humans"[MeSH Terms] AND English[lang]</p> <p>Ophthalmic evaluation[Title/Abstract] AND Surgery[Title/Abstract] AND ("2011/01/01"[PDAT] : "2017/06/01"[PDAT]) AND "humans"[MeSH Terms] AND English[lang]</p> <p>Intraocular Pressure[Title/Abstract] AND Surgery[Title/Abstract] AND ("2011/01/01"[PDAT] : "2017/06/01"[PDAT]) AND "humans"[MeSH Terms] AND English[lang]</p> <p>Optic Nerve[Title/Abstract] AND Surgery[Title/Abstract] AND ("2011/01/01"[PDAT] : "2017/06/01"[PDAT]) AND "humans"[MeSH Terms] AND English[lang]</p> <p>(CRAO[Title/Abstract] AND Surgery[Title/Abstract]) AND Prone[Title/Abstract] AND ("2011/01/01"[PDAT] : "2017/06/01"[PDAT]) AND "humans"[MeSH Terms] AND English[lang]</p> <p>cortical blindness[Title/Abstract] AND ("2017/06/01"[PDAT] : "2018/12/31"[PDAT]) AND "humans"[MeSH Terms] AND English[lang]</p> <p>(Ophthalmic evaluation[Title/Abstract] AND ("2017/06/01"[PDAT] : "2018/12/31"[PDAT]) AND "humans"[MeSH Terms] AND English[lang]) AND spine surgery[Text Word] AND ("2017/06/01"[PDAT] : "2018/12/31"[PDAT]) AND "humans"[MeSH Terms] AND English[lang]</p> <p>((("postoperative period"[MeSH Terms] OR ("postoperative"[All Fields] AND "period"[All Fields]) OR "postoperative period"[All Fields] OR ("post"[All Fields] AND "operative"[All Fields]) OR "post operative"[All Fields]) AND vision loss[Title/Abstract] AND ("2017/06/01"[PDAT] : "2018/12/31"[PDAT]) AND "humans"[MeSH Terms] AND English[lang]) AND (("spine"[MeSH Terms] OR "spine"[All Fields]) AND sugery[All Fields]) AND ("2017/06/01"[PDAT] : "2018/12/31"[PDAT]) AND "humans"[MeSH Terms] AND English[lang])</p> |
| <b>Databases searched</b>                                                      | <i>PubMed, Science Direct, Google Scholar</i>                                                                                                                                                                                                                                                                                                                                                                                                                                                                                                                                                                                                                                                                                                                                                                                                                                                                                                                                                                                                                                                                                                                                                                                                                                                                                                                                                                                                                                                                                                                                                                                                                                                                                                                                                                                                                                                                                                                                                                                                                                                                                                                                                                                                                                                                                                                                                                                                                                                                                                                                                                                                                                                                                                                                                                                                                                                                                                                                                                                                                                                                                                                                                                                                                                                                                                                                                                                                                                                                                                                                                                                  |
| <b>Part of journals searched</b>                                               | <i>Keywords in abstract, title, and subject headings</i>                                                                                                                                                                                                                                                                                                                                                                                                                                                                                                                                                                                                                                                                                                                                                                                                                                                                                                                                                                                                                                                                                                                                                                                                                                                                                                                                                                                                                                                                                                                                                                                                                                                                                                                                                                                                                                                                                                                                                                                                                                                                                                                                                                                                                                                                                                                                                                                                                                                                                                                                                                                                                                                                                                                                                                                                                                                                                                                                                                                                                                                                                                                                                                                                                                                                                                                                                                                                                                                                                                                                                                       |

|                                        |                                                                                                                                                                                                                                                                                                                                                                                                                                                                                                                                                                                                                                                                                                                                                                                                                                                                                                                                                                                                                                                        |
|----------------------------------------|--------------------------------------------------------------------------------------------------------------------------------------------------------------------------------------------------------------------------------------------------------------------------------------------------------------------------------------------------------------------------------------------------------------------------------------------------------------------------------------------------------------------------------------------------------------------------------------------------------------------------------------------------------------------------------------------------------------------------------------------------------------------------------------------------------------------------------------------------------------------------------------------------------------------------------------------------------------------------------------------------------------------------------------------------------|
| <b>Years of search</b>                 | 2011-2018                                                                                                                                                                                                                                                                                                                                                                                                                                                                                                                                                                                                                                                                                                                                                                                                                                                                                                                                                                                                                                              |
| <b>Language</b>                        | English Only                                                                                                                                                                                                                                                                                                                                                                                                                                                                                                                                                                                                                                                                                                                                                                                                                                                                                                                                                                                                                                           |
| <b>Types of studies to be included</b> | All studies found in peer-reviewed journals.                                                                                                                                                                                                                                                                                                                                                                                                                                                                                                                                                                                                                                                                                                                                                                                                                                                                                                                                                                                                           |
| <b>Inclusion criteria</b>              | Patients having spine surgery under anesthesia in prone position.                                                                                                                                                                                                                                                                                                                                                                                                                                                                                                                                                                                                                                                                                                                                                                                                                                                                                                                                                                                      |
| <b>Exclusion criteria</b>              | <p>Grey literature, animal studies, age less than 12 years</p> <p>Exclusion Reasons:</p> <ol style="list-style-type: none"> <li>1. Review, letter, editorial or meta-analysis with no original data</li> <li>2. Non-English</li> <li>3. Article or abstract not peer-reviewed</li> <li>4. Study outside of designated search dates</li> <li>5. Patients excluded from or not identified by evidence model (e.g. children under 12 years, patients with preoperative visual loss)</li> <li>6. Interventions excluded from or not identified by evidence model (non-spine surgeries, treatment for spine injuries, surgery comparative study)</li> <li>7. Outcomes excluded from or not relevant to evidence model (no visual loss outcomes reported)</li> <li>8. Unable to interpret findings due to data or research design flaws</li> <li>9. Duplicate data presented in different reviewed articles</li> <li>10. Animal study</li> <li>11. Not relevant study design (e.g. quality improvement study, diagnostic study, laboratory study)</li> </ol> |
